# Supplementary material
Source: Research Square preprint supplement (doi:10.21203/rs.3.rs-9088560/v1)
Supplement: Supplementary file 1 [file 9570782dfbd4646ba5e4aac6.docx]

Supplementary Information

Electrically Driven Meron-Antimeron Pairs in a Magnetic Domain Wall

Jiseok Yang1, Taekhyeon Lee1, San Ko1, Soogil Lee2, Mincheol Shin3, Kyoung-Woong Moon4†, Sanghoon Kim5†, Se Kwon Kim1,6†, and Kab-Jin Kim1,6†

*1Department of Physics, KAIST, Daejeon 34141, Republic of Korea*

*2Department of Semiconductor Engineering, Gachon University, Seongnam 13120, Republic of Korea*

3School of Electrical Engineering, KAIST, Daejeon 34141, Republic of Korea

*4Quantum Spin Team, Korea Research Institute of Standards and Science, Daejeon 34113, Republic of Korea*

5Department of Physics, University of Ulsan, Ulsan 44610, Republic of Korea

*6Graduate School of Quantum Science and Technology, KAIST, Daejeon 34141, Republic of Korea*

† Correspondence to: [kwmoon@kriss.re.kr](mailto:kwmoon@kriss.re.kr), [sanghoon.kim@ulsan.ac.kr](mailto:sanghoon.kim@ulsan.ac.kr), [sekwonkim@kaist.ac.kr](mailto:sekwonkim@kaist.ac.kr), [kabjin@kaist.ac.kr](mailto:kabjin@kaist.ac.kr)

**The PDF file includes:**

Supplementary Figures 1 to 4

Captions for supplementary movies

**Other Supplementary Material for this manuscript includes the following:**

Supplementary Movies S1 to S3

**Supplementary figures**

**
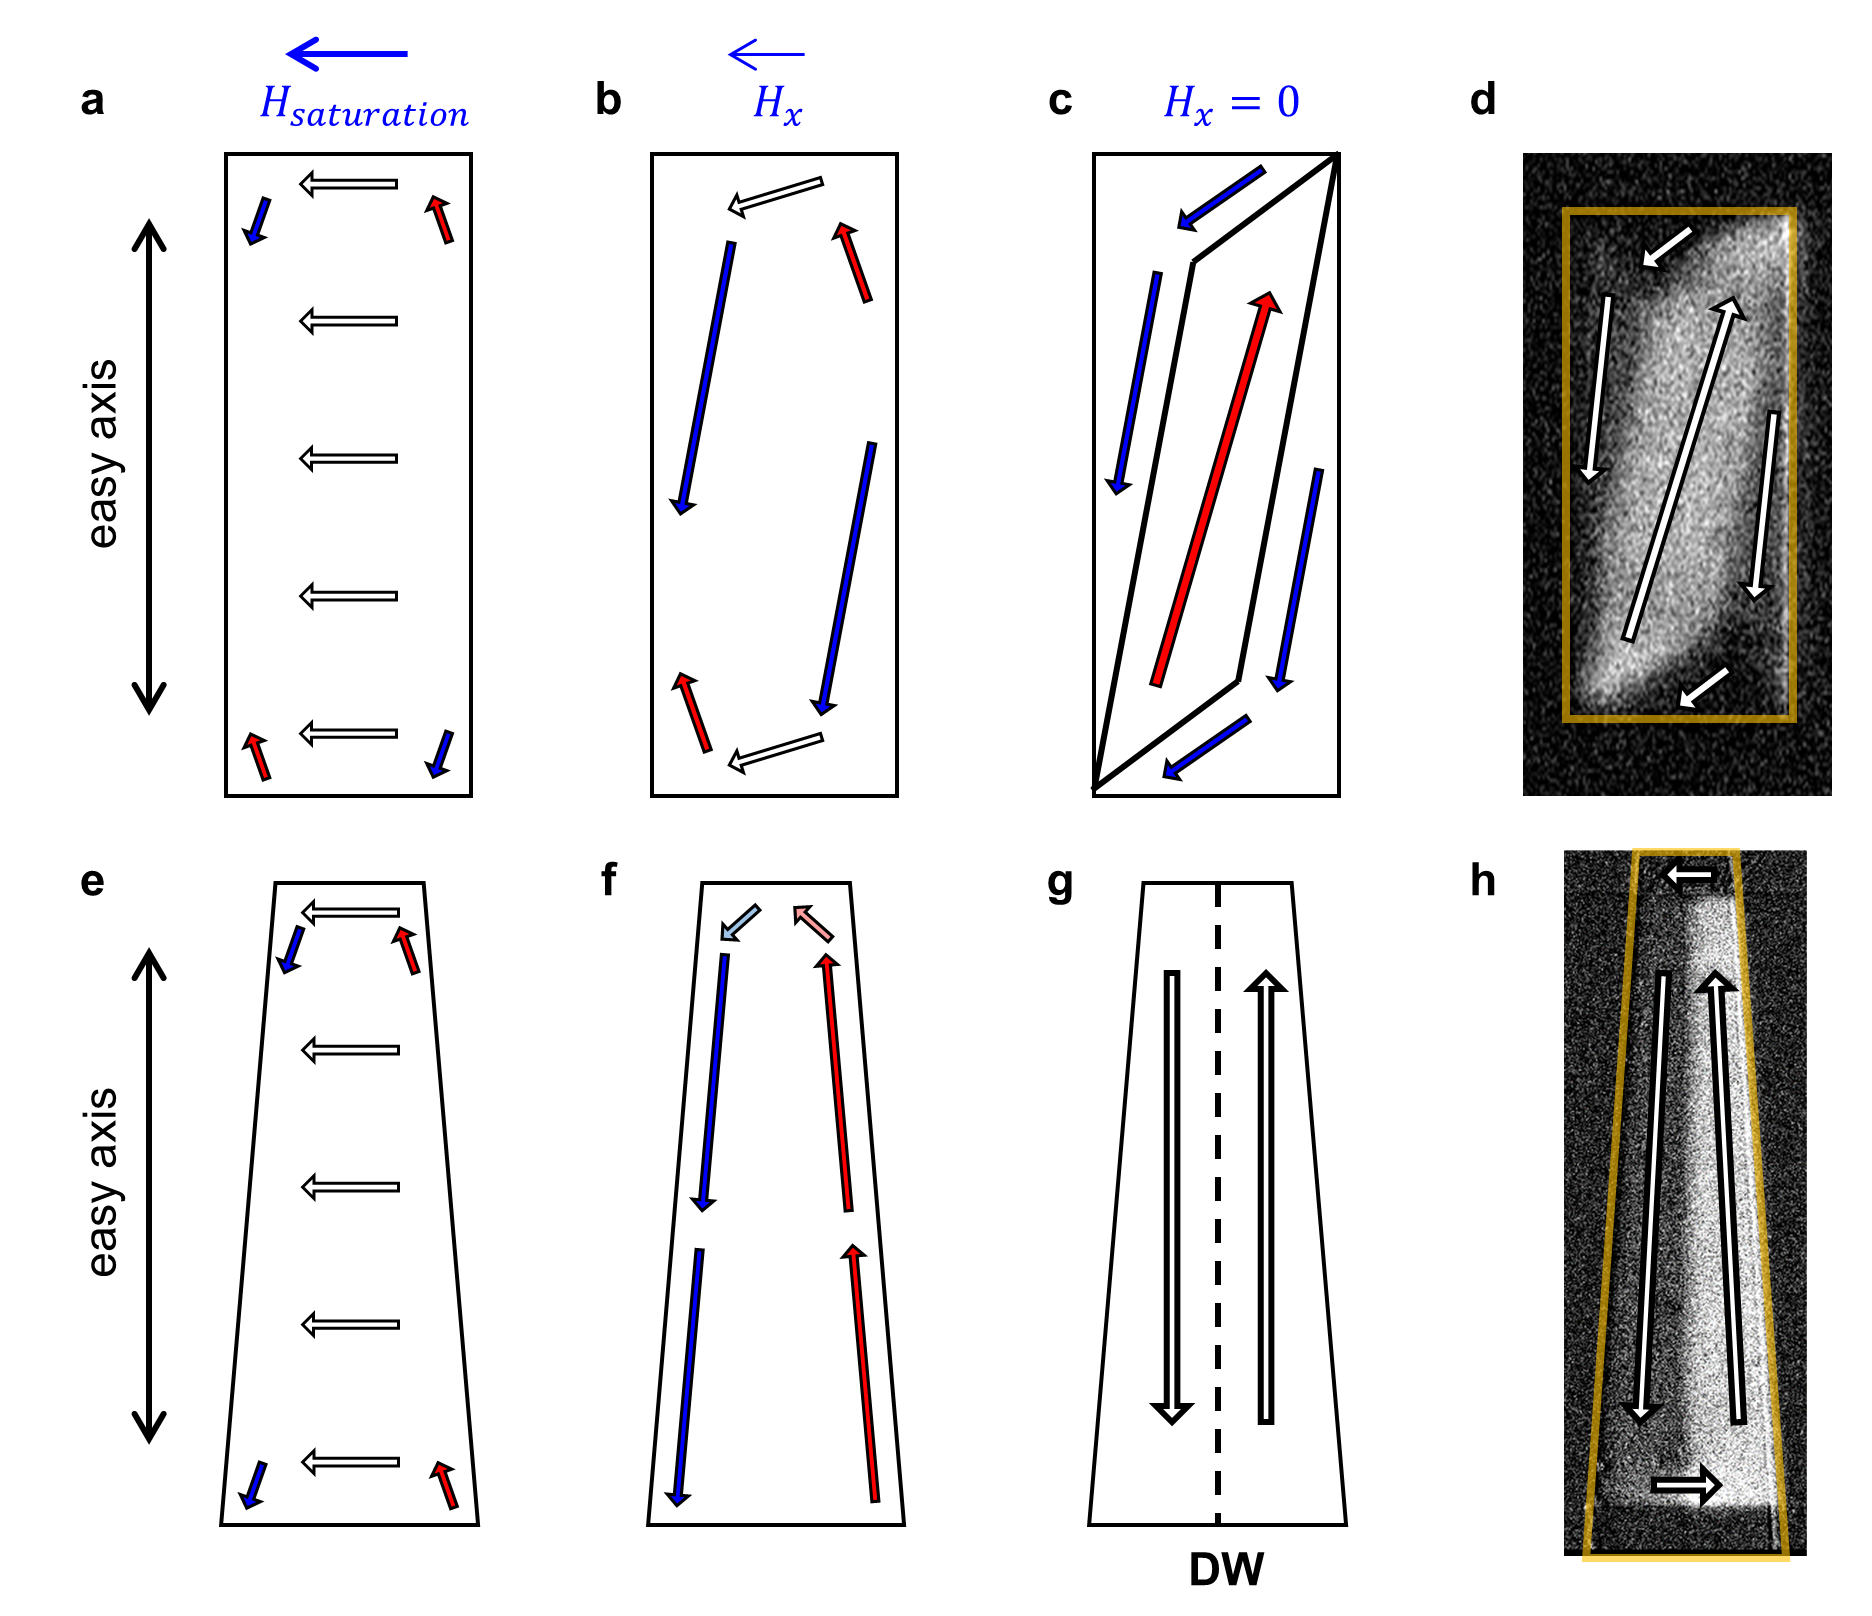
**

**Fig. S1. Formation of Domain Walls in Rectangular and Trapezoidal Devices. a-c**, Schematics illustrating domain configurations in a rectangular device: A diagonal domain pattern forms when a transverse field pulse () is applied. **d**, L-MOKE image showing the resulting domain configuration in a rectangular device after the transverse field is removed. **e-g**, Schematics depicting domain configurations in a trapezoidal device: A central domain wall (DW) can be reliably formed due to the geometry's influence. **h**, L-MOKE image displaying a well-defined central DW in the trapezoidal device after a transverse field pulse.

**
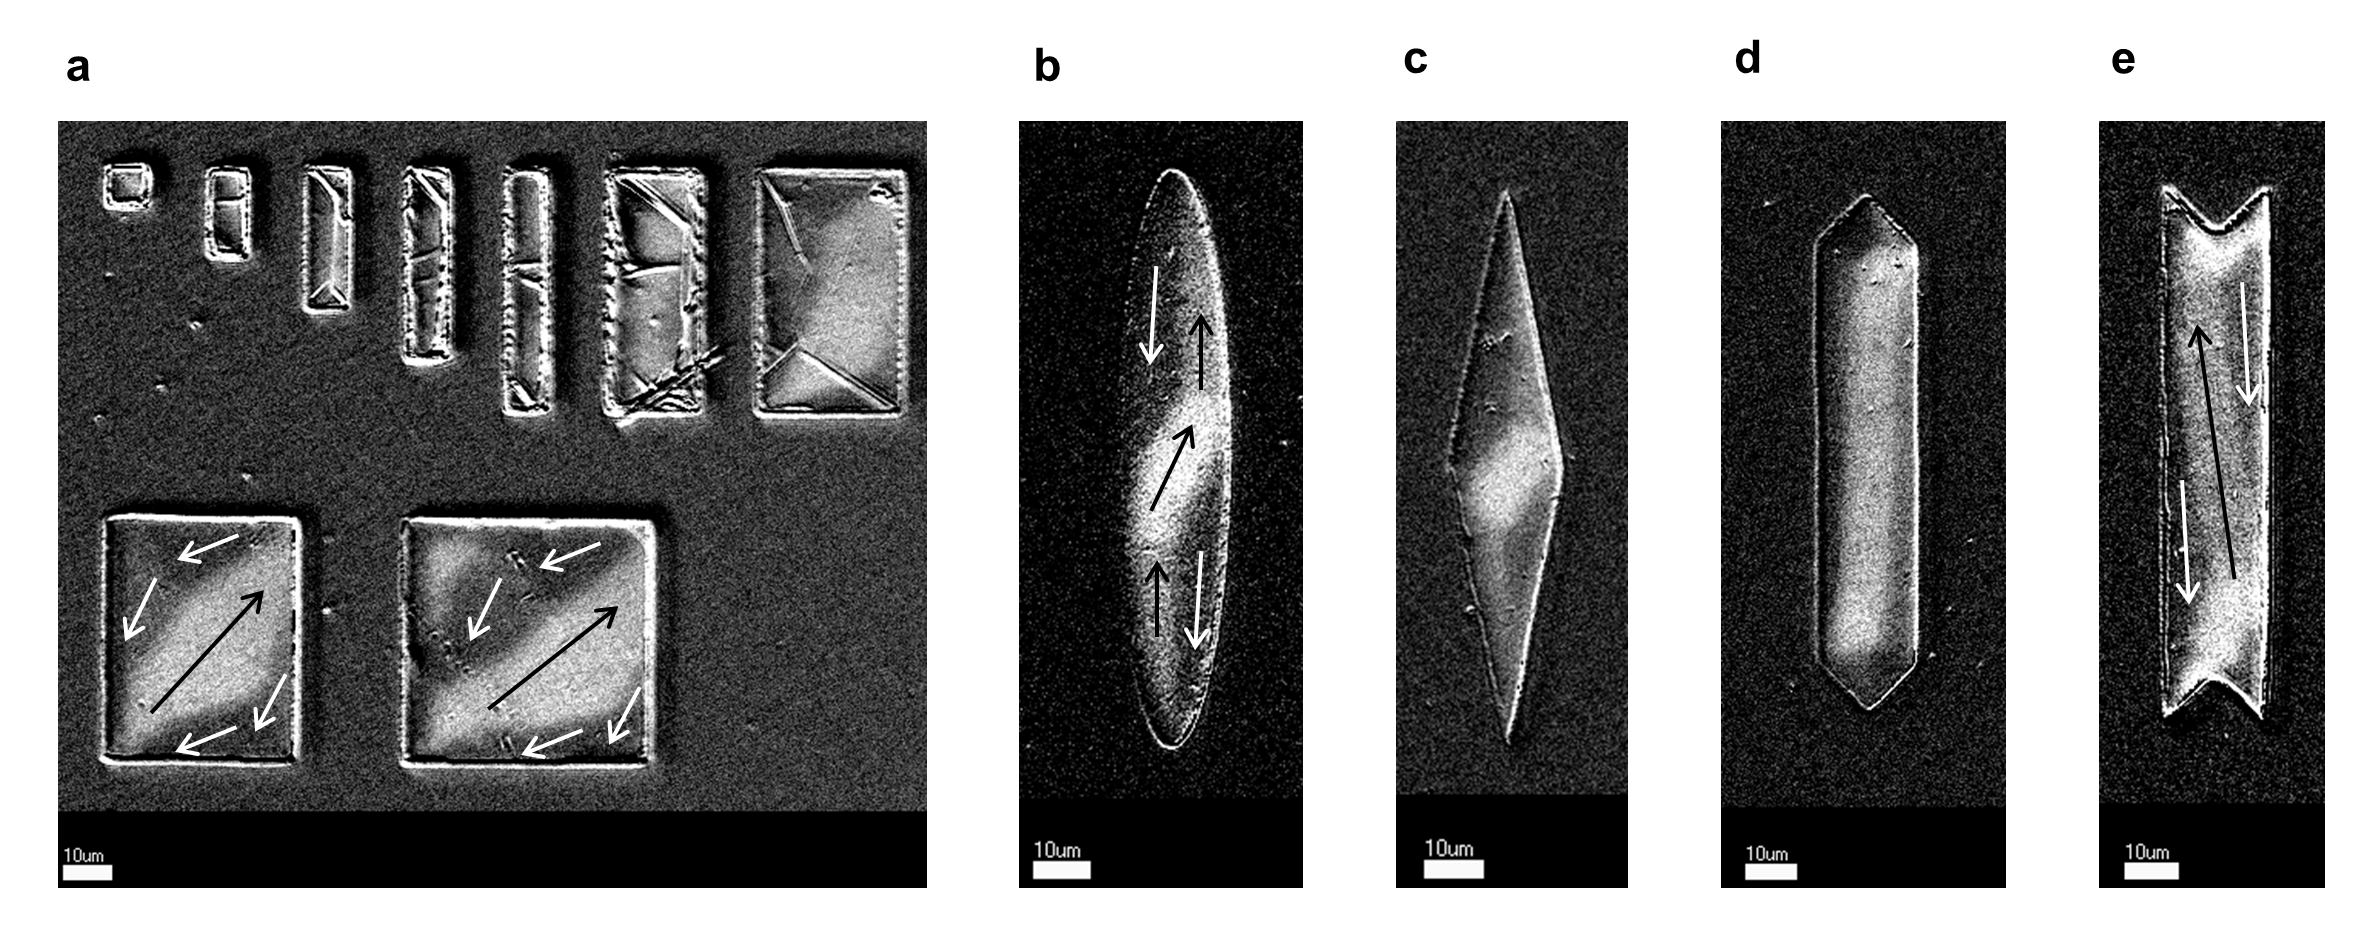
**

**Fig. S2. L-MOKE images showing domain configurations observed in various device geometries. a**, Rectangular devices with various dimensions. **b**, Elliptical devices. **c**, Diamond-shaped devices. **d**, Elongated hexagonal devices. **e**, Wedged wire devices. Each geometry demonstrates distinct domain formation patterns, illustrating the influence of device shape on magnetic domain configurations. The scale bar represents 10 µm.


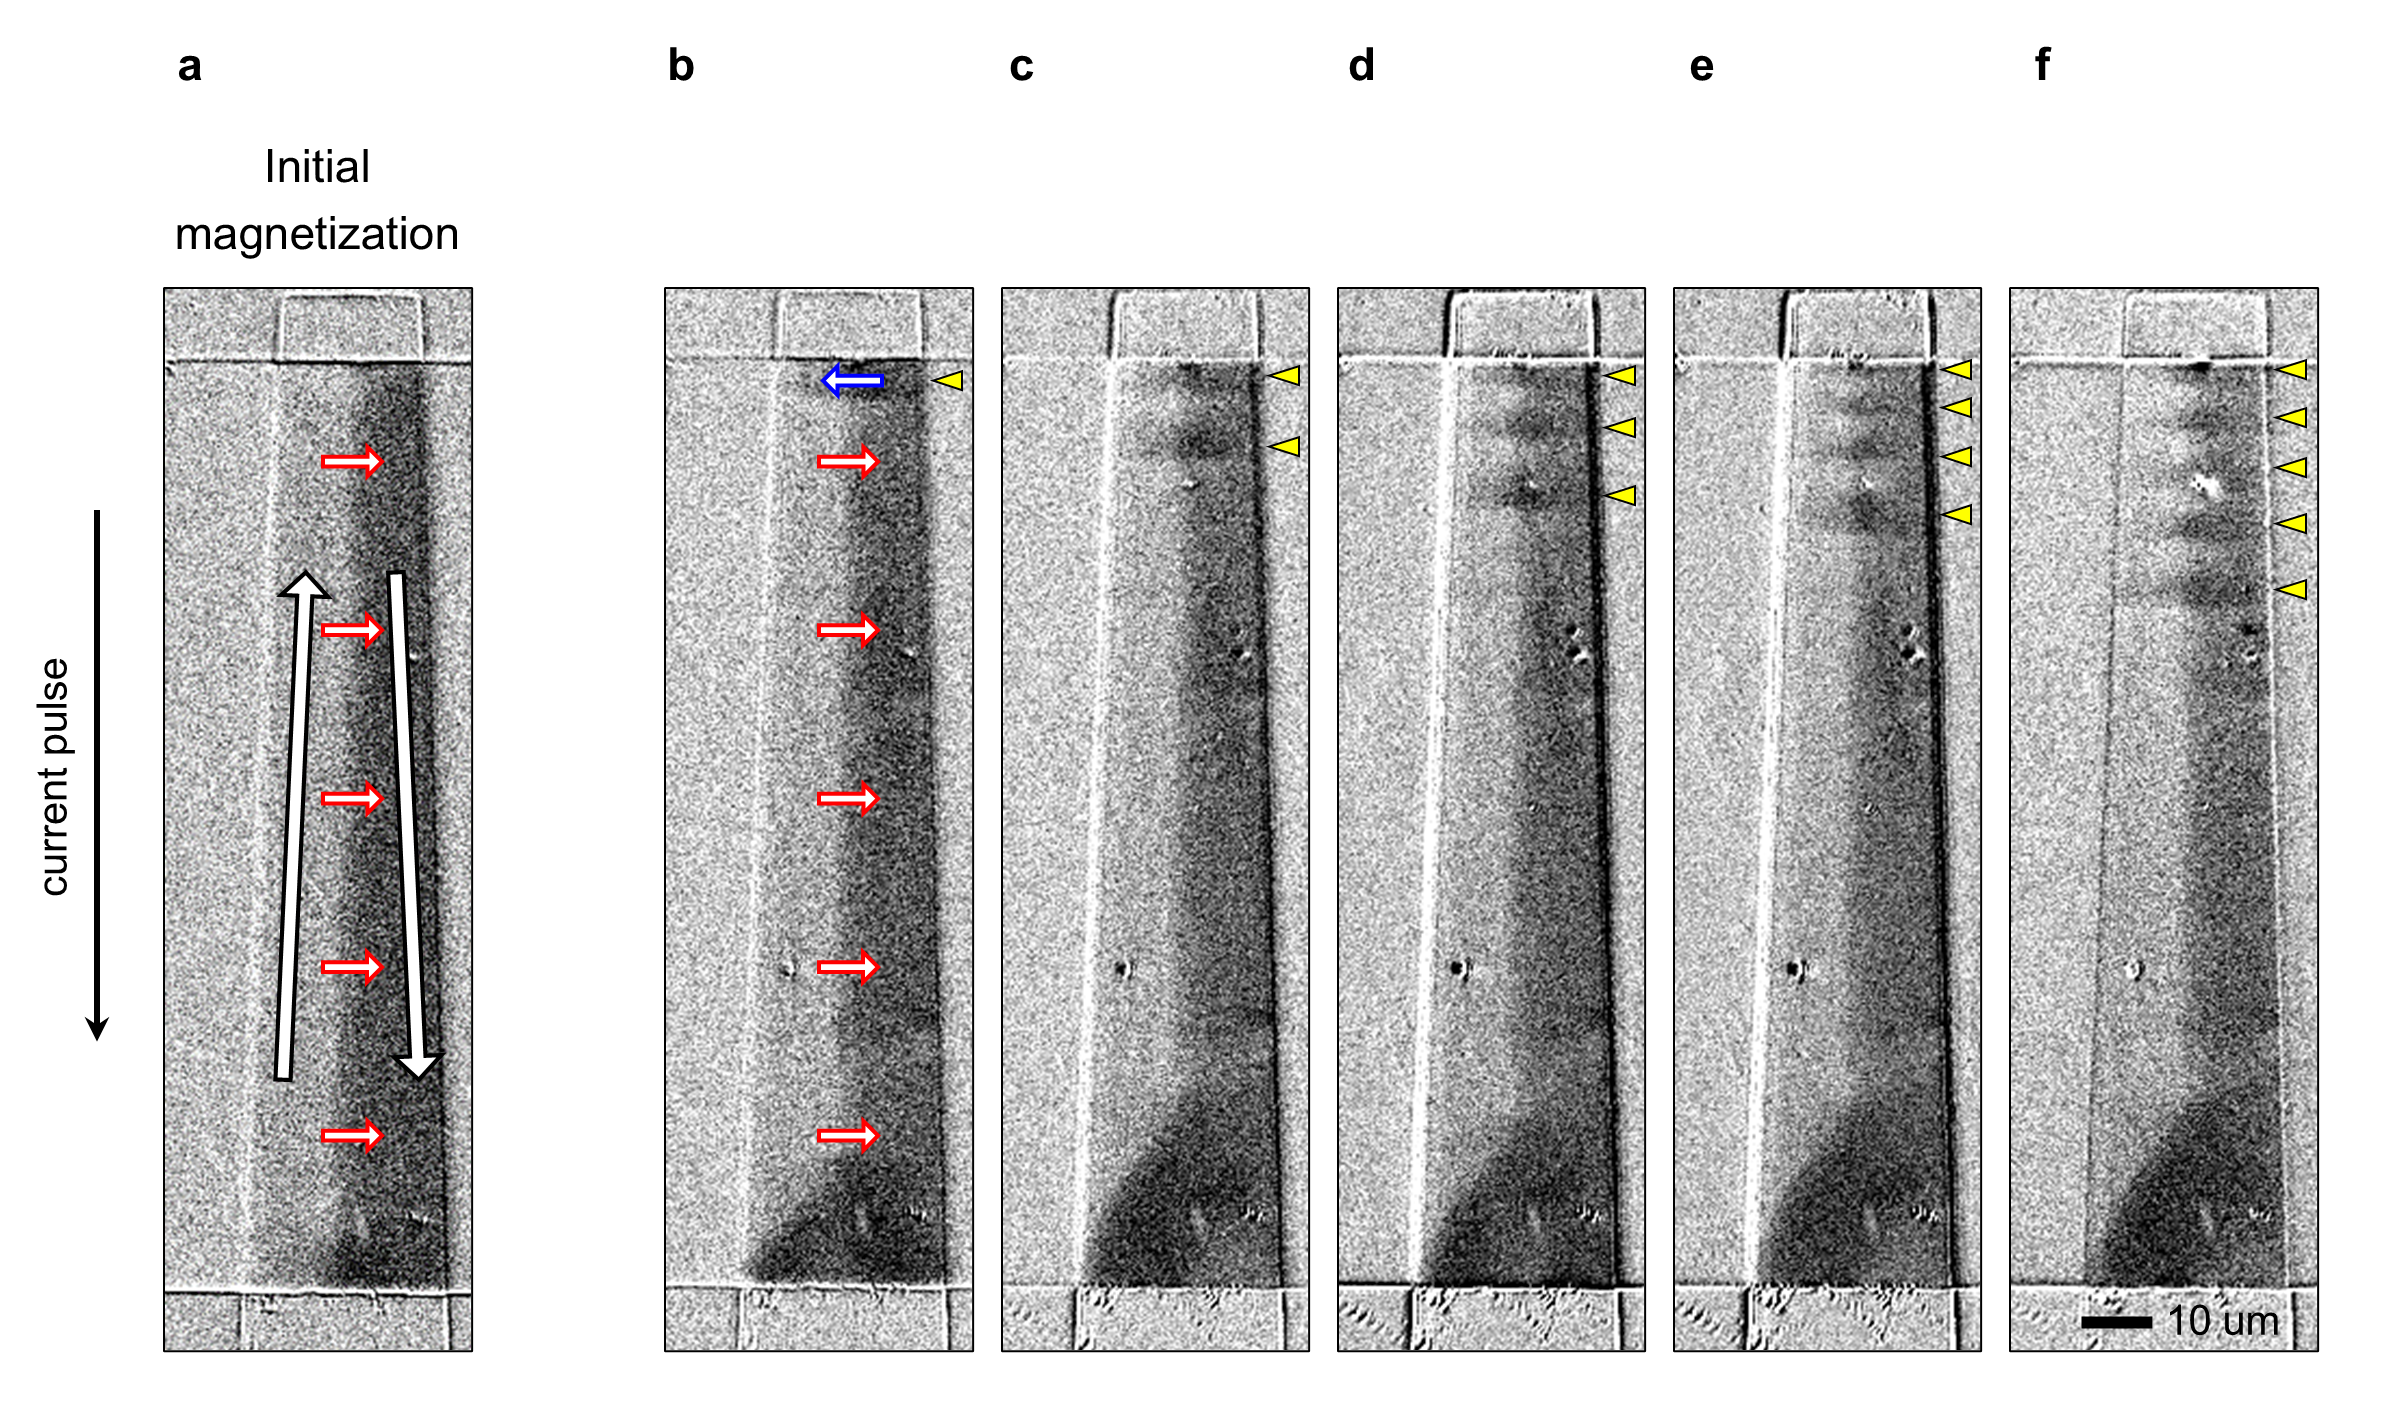


**Fig. S3. Current-induced injection and propagation of meron-antimeron pairs, with an opposite domain configurations and current pulses from those of Figs. 3d-3i. a**, L-MOKE image showing the initial magnetization direction after applying along the direction, which is opposite configuration compared to Fig. 3 of the main text. **b-f**, L-MOKE image sequence indicating the sequential injection and propagation of meron-antimeron pairs under repeated current pulses. Yellow arrowheads mark the locations of meron-antimeron pairs. The scale bar represents 10 µm.

**
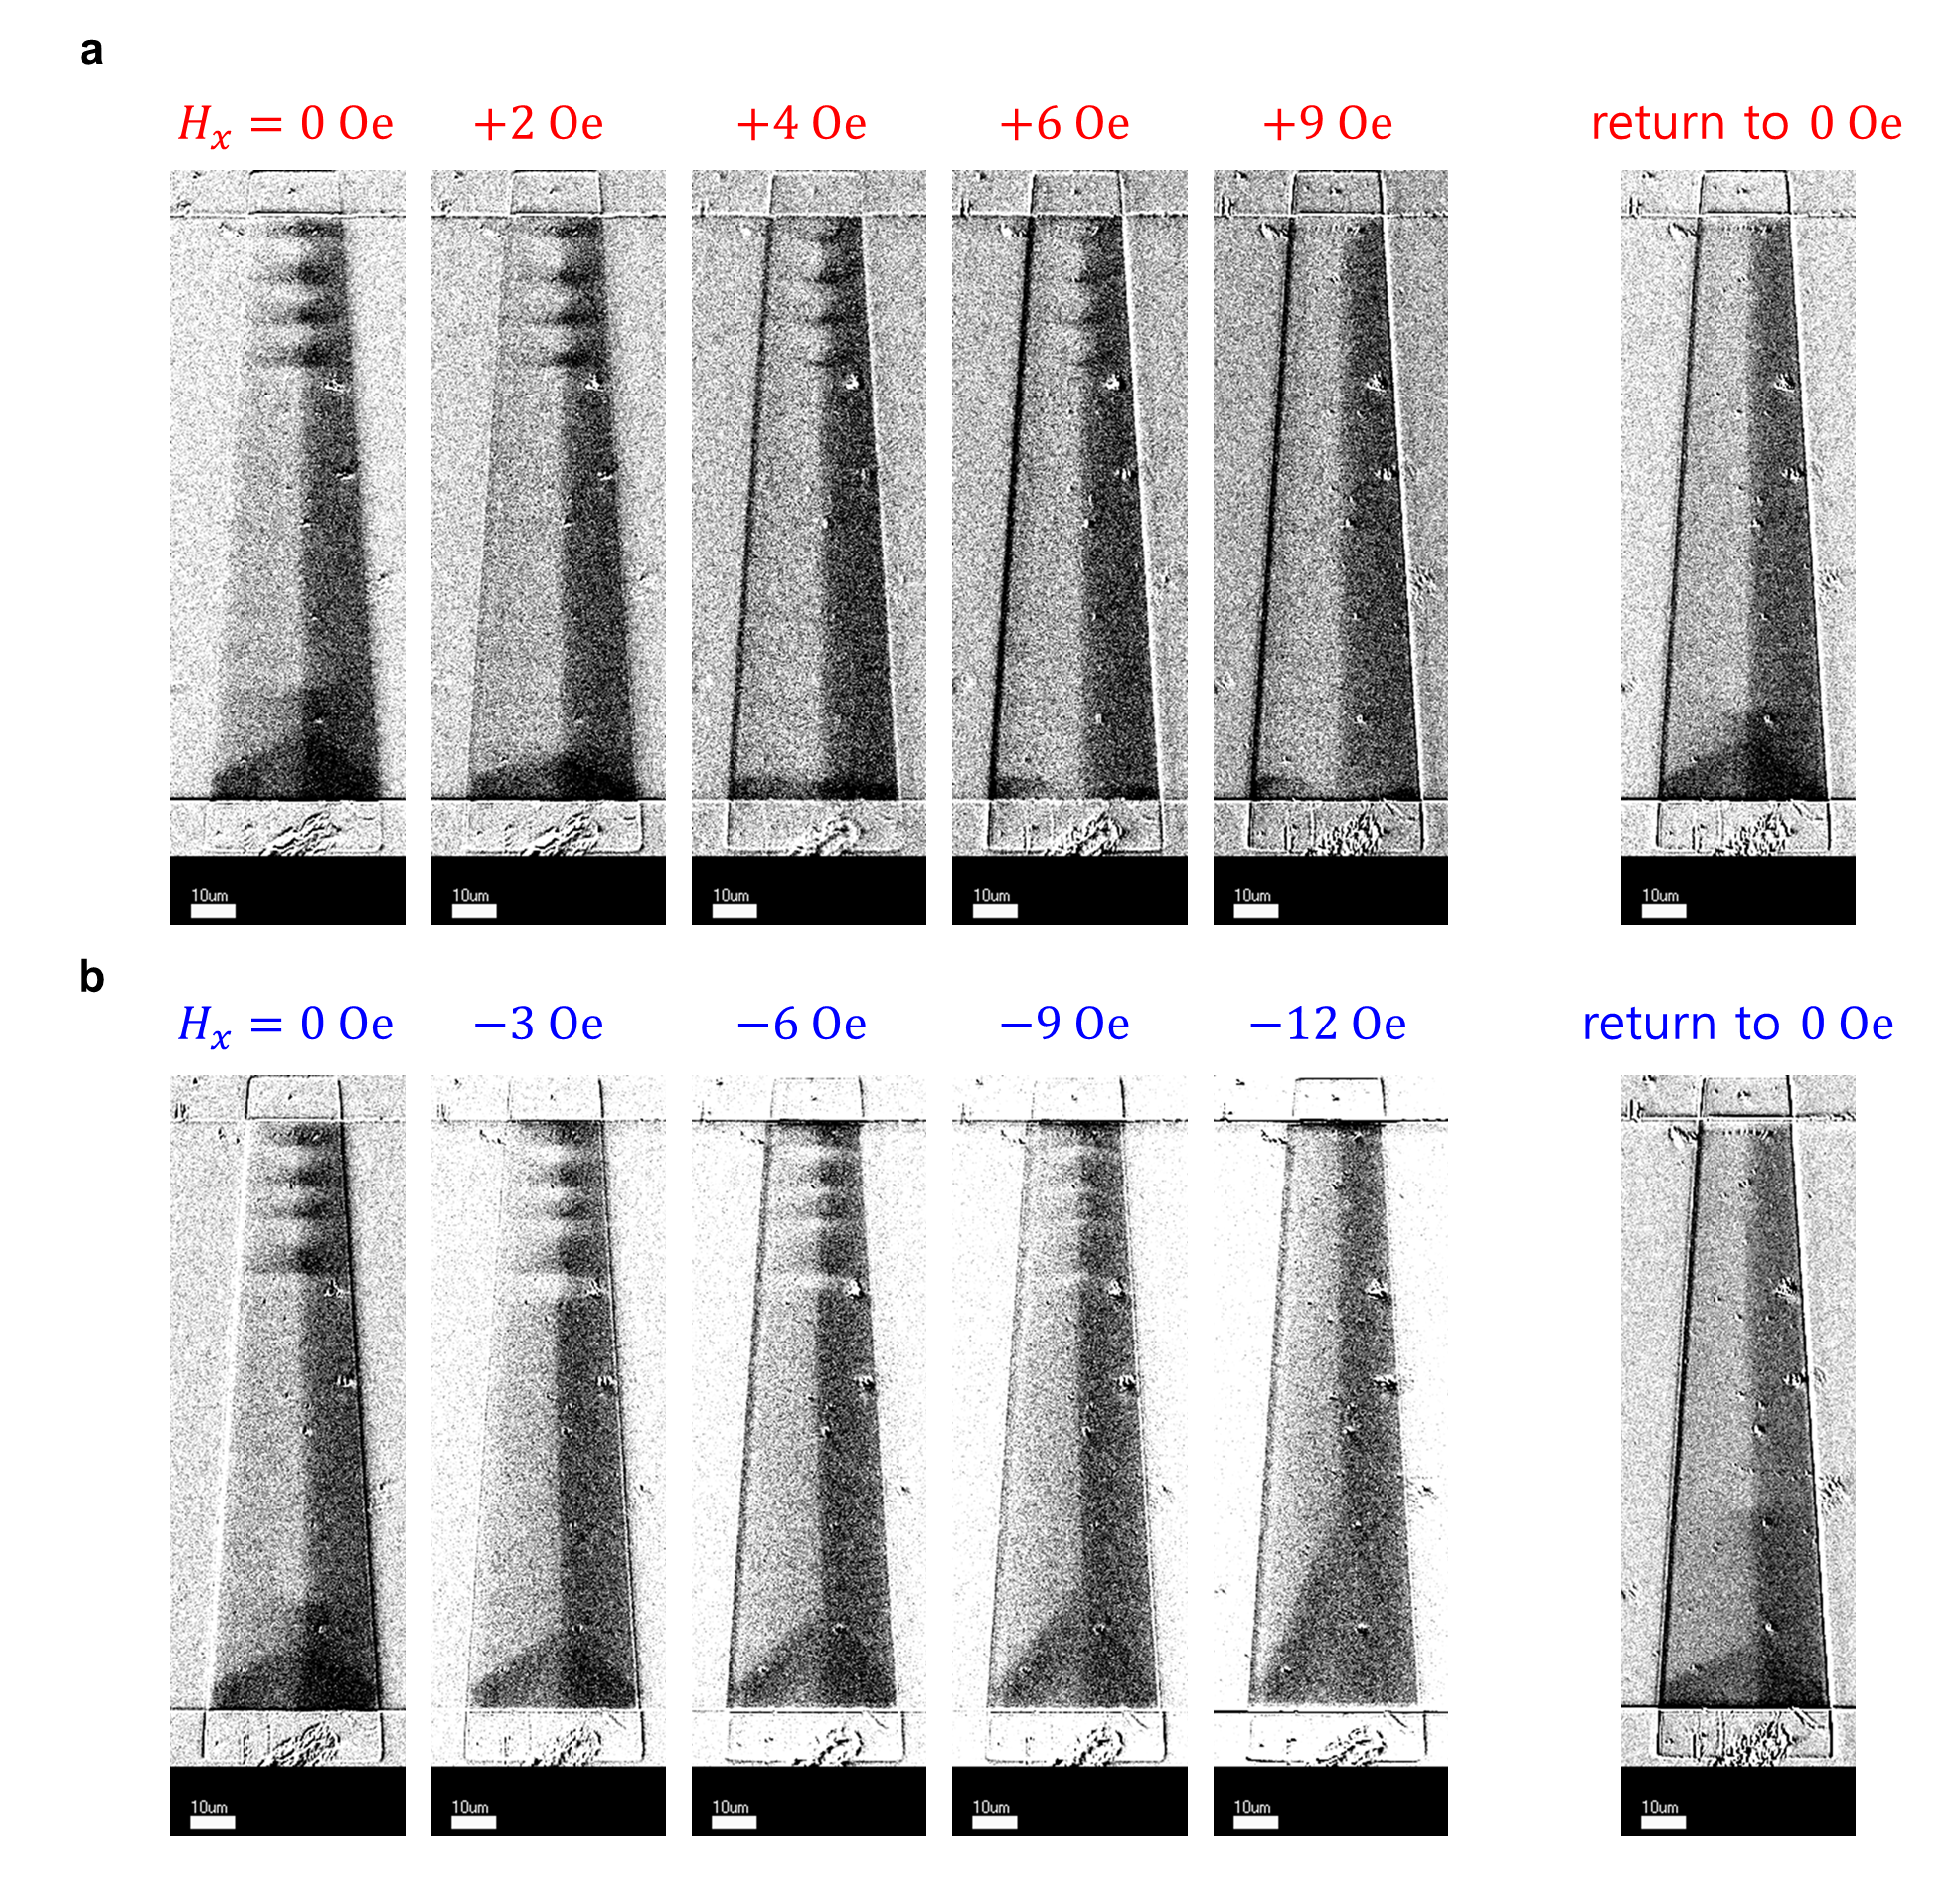
**

**Fig. S4. Demonstration of topological energy barriers in meron-antimeron pair annihilation with opposite domain configurations. a**, L-MOKE images showing the effect of a gradually increasing transverse magnetic field () from 0 Oe to +9 Oe, followed by a return to 0 Oe. **b**, L-MOKE images showing the effect of a decreasing transverse magnetic field () from 0 Oe to -12 Oe, followed by a return to 0 Oe. These results complement the observations in Fig. 4 of the main text with an opposite magnetization configuration.

# **Captions for supplementary movies**

**Movies S1. Meron_antimeron_formation.mp4** Micromagnetic simulations of the formation of a meron-antimeron pair. (left) Formation of antimeron (vortex with core up, )-meron (antivortex with core up, ) pair. (right) Formation of meron (vortex with core down, )-antimeron (antivortex with core down, ) pair. Both processes conserve the total topological number.

**Movies S2. Sequential_injection_MUMAX.mp4** Micromagnetic simulations of the sequential injection of meron-antimeron pairs shown in Fig. 1b-1f in the main text. The total simulation time is 48 ns, consisting of a repeated 4 times of 12 ns process–2 ns for applying current-induced Oersted field to form a meron-antimeron pair, followed by 10 ns for relaxation without external field.

**Movies S3. Sequential_injection_MOKE.mp4** L-MOKE image sequence of the sequential injection of meron-antimeron pairs shown in Fig. 3d-3i in the main text. MOKE images were taken one second after each current pulse was applied, with each image averaged over 100 frames.
